# Supplementary material for: Contested Heritage or Cancel Culture? The Case of Ivan Meštrović’s Public Sculptures in Chicago
Source: MDPI journal article supplement (doi:10.3390/heritage5030142), 2022-09-16
Supplement: s1 [file s1]

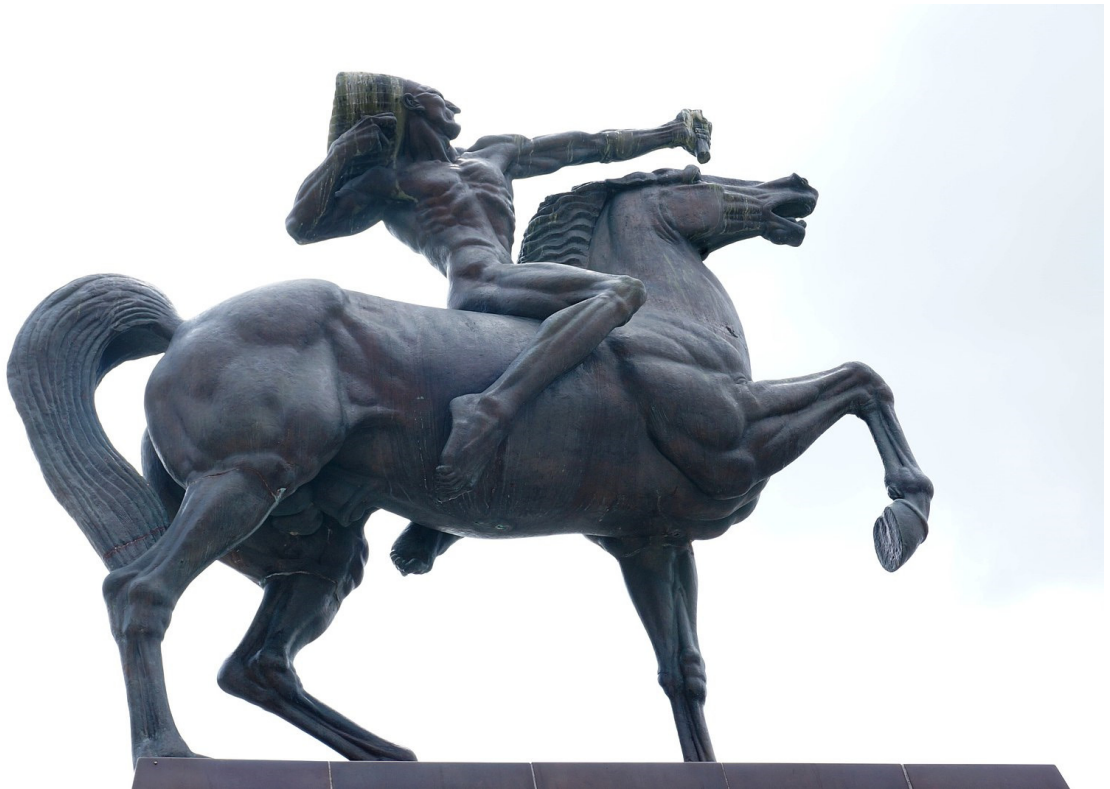

**Figure S1.** The Bowman (Photo credit: Ponor/Public Domain).

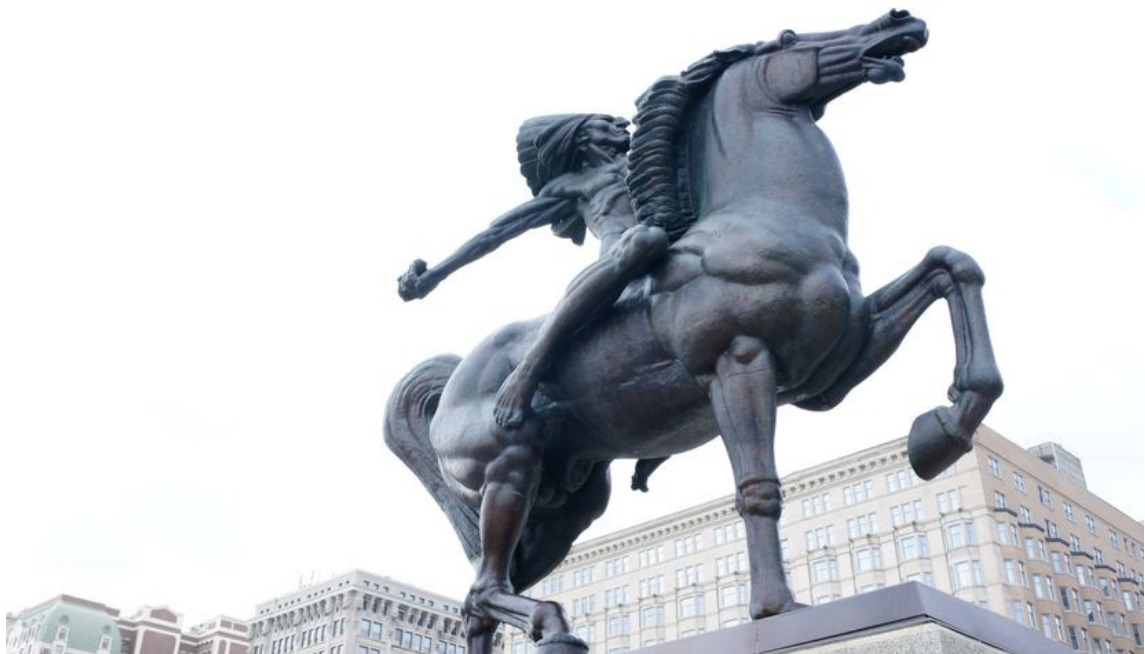

**Figure S2.** The Spearman (Photo credit: Ponor/Public Domain).
